# Supplementary material for: Variations in the Hemagglutinin of the 2009 H1N1 Pandemic Virus: Potential for Strains with Altered Virulence Phenotype?
Source: PubMed Central journal article supplement (PMC2954835; doi:10.1371/journal.ppat.1001145), 2010-10-14
Supplement: ppat.1001145.s001.pdf [file ppat.1001145.s001.pdf]

**Table S1. Peak virus titers and clinical signs in groups of ferrets infected with either ma-Ca/04 or Ca/04 viruses.**

| Virus               | ma-Ca/04 <sup>a</sup>              |                                      |                                   | Ca/04 <sup>b</sup>    |                         |                          |
|---------------------|------------------------------------|--------------------------------------|-----------------------------------|-----------------------|-------------------------|--------------------------|
|                     | Peak nasal wash titer <sup>c</sup> | Sneezing (Day of onset) <sup>d</sup> | Peak bodyweight loss (%)          | Peak nasal wash titer | Sneezing (Day of onset) | Peak bodyweight loss (%) |
| Infected            | 6.7 ± 0.4                          | 4/4 (3,4,4,4)                        | >20 <sup>e</sup> ; 3.4, 10.9, 6.6 | 6.7 ± 1.0             | 2/2 (4,5)               | 14.7, 5.3                |
| Direct Contact      | 6.9 ± 0.5                          | 4/4 (3,4,5,7)                        | 10.7, 6.2, 0.0 <sup>f</sup> , 0.0 | 5.6 ± 0.6             | 2/2 (6,8)               | 8.8, 6.6                 |
| Respiratory Contact | 6.6 ± 0.5                          | 2/4 (8,11)                           | 10.0, 3.6, 1.7, 8.8               | 5.5 ± 1.7             | 2/2 (9,9)               | 7.4, 9.3                 |

<sup>a</sup> Data corresponds to two independent experiments with 2 groups each. Each group consisted of 1 inoculated ferret, 1 direct contact and 1 respiratory droplet contact as described [41]. <sup>b</sup> Data correspond to one experiment with 2 groups as explained in (a). <sup>c</sup> Titers expressed in log<sub>10</sub>TCID<sub>50</sub>/ml of nasal wash. <sup>d</sup> Day of onset of sneezing calculated from 0 (zero) dpi. <sup>e</sup> Ferret sacrificed at 6 dpi. <sup>f</sup> Two ferrets in the direct contact groups gained weight.
